# Supplementary material for: Productivity costs associated with reactive school closures related to influenza or influenza-like illness in the United States from 2011 to 2019
Source: medRxiv preprint, doi:10.1101/2023.01.05.23284221, version 1 (2023-01-07)
Supplement: Appendices [file 284221_file03.docx]

**Appendix 1-1.** Equations for estimating productivity costs of parents, teachers, and non-teaching school staff

**Appendix 1-2.** Parameters values and assumptions for productivity costs estimation

| **Parameter Description** | **Base Value** | **Range** | **Source** |
| --- | --- | --- | --- |
| State- and year-specific average hourly wages for parents  (2019 USD; BLS code 00-0000) | - 2012: $18.9‒$40.7 - 2013: $19.0‒$40.6 - 2014: $19.2‒$40.8 - 2015: $19.5‒$41.6 - 2016: $19.6‒$42.5 - 2017: $19.5‒$43.0 - 2018: $19.3‒$43.0 - 2019: $19.3‒$43.2   (varies by state) | NA | [1] |
| State- and year-specific average annual wages for elementary and middle school teachers (2019 USD; BLS code 25-2021) | - 2012: $44,429‒$82,744 - 2013: $44,335‒$80,154 - 2014: $44,287‒$80,809 - 2015: $45,042‒$81,650 - 2016: $43,833‒$82,372 - 2017: $42,273‒$84,003 - 2018: $41,182‒$84,512 - 2019: $44,060‒$82,830   (varies by state) | NA | [1] |
| State- and year-specific average annual wages for high school teachers (2019 USD; BLS code 25-2031) | - 2012: $44,618‒$82,544 - 2013: $44,478‒$82,579 - 2014: $45,853‒$82,807 - 2015: $46,337‒$86,881 - 2016: $45,228‒$87,368 - 2017: $43,681‒$89,093 - 2018: $43,310‒$86,844 - 2019: $44,610‒$87,240   (varies by state) | NA | [1] |
| Weighted average of national daily wage for non-teaching school staff (2019 USD, varies by year) | $56,646‒$59,495 | NA | [1-3] |
| Staff-student ratio | 1:8 | NA | [4] |
| Average children per household | 1.75 | NA | [5] |
| Fraction of households with children who missed work during unplanned school closures | 20% [6] | 10%–45% | [6-11] |
| Nonwage benefits as a fraction of total wage + nonwage pay for employees (varies by year) | 44.5%‒46.4% | NA | [12] |

USD: US dollars, BLS: U.S. Bureau of Labor Statistics, NA: Not applicable

**Appendix 2.** Mean annual number of ILI-related reactive school closures and mean annual productivity costs, by study period

|  | **2011/12‒2015/16** | **2016/17‒2018/19** | **2011/12‒2018/19** |
| --- | --- | --- | --- |
| **Mean annual number of school closure (n)** | 165 | 1,711 | 745 |
| **Mean annual productivity cost (2019 USD)** |  |  |  |
| Overall | 9,061,300 | 143,713,921 | 59,556,033 |
| School staff | 3,267,293 | 52,551,742 | 21,748,961 |
| Teachers | 2,907,257 | 44,788,458 | 18,612,707 |
| Parents | 2,886,751 | 46,373,721 | 19,194,364 |

ILI, influenza or influenza-like illness

**Appendix 3.** Number of schools with multiple ILI-related reactive school closures, from 2011-2012 to 2018-2019

|  | n | % |
| --- | --- | --- |
| Number of school closures in a given school year | | | |
| 1 | 3,038 | 86.8 |
| 2 | 448a | 12.8 |
| 3 | 15b | 0.4 |
| Total | 3,501 | 100 |
| Number of school closures from 2011-12 to 2018-19 | | | |
| 1 | 2,184 | 62.4 |
| 2 | 689c | 19.7 |
| 3 | 357d | 10.2 |
| 4 | 94e | 2.7 |
| 5 | 155f | 4.4 |
| 7 | 3f | 0.1 |
| 8 | 17f | 0.5 |
| 9 | 2f | 0.1 |
| Total | 3,501 | 100 |

a Among 448 schools, 274 schools (61%) were located in Tennessee, 83 schools (19%) were in Kentucky, 19 schools (4%) in Texas, 18 schools (4%) in Michigan, and 13 schools (3%) were in Alabama.

b Among 15 schools, 10 schools (67%) were located in Kentucky, 5 schools (33%) were in Tennessee.

c Among 689 schools, 381 schools (55%) were located in Tennessee, 119 schools (17%) were in Kentucky, 38 schools (6%) in Texas, 37 schools (5%) in Michigan, and 30 schools (4%) were in Oklahoma.

d Among 357 schools, 202 schools (57%) were located in Tennessee and 114 schools (32%) were in Kentucky.

e Among 94 schools, 44 schools (47%) were located in Kentucky and 43 schools (46%) were in Tennessee.

f All schools (100%) are located in Tennessee.

ILI, influenza or influenza-like illness

**Appendix 4.** Number of ILI-related reactive school closures by length of closures and academic year

| Academic Year |  | Length of school closures (per closure) a | | | | | | | |
| --- | --- | --- | --- | --- | --- | --- | --- | --- | --- |
| n or % | 1-day | 2-day | 3-day | 4-day | 5-day | 6-day | 7-day | Total |
| 2011-2012 | n | 81 | 23 | 0 | 0 | 0 | 0 | 0 | 104 |
|  | % | 77.9 | 22.1 | 0.0 | 0.0 | 0.0 | 0.0 | 0.0 | 100 |
| 2012-2013 | n | 218 | 104 | 33 | 20 | 0 | 0 | 0 | 375 |
|  | % | 58.1 | 27.7 | 8.8 | 5.3 | 0.0 | 0.0 | 0.0 | 100 |
| 2013-2014 | n | 11 | 0 | 0 | 0 | 0 | 0 | 0 | 11 |
|  | % | 100.0 | 0.0 | 0.0 | 0.0 | 0.0 | 0.0 | 0.0 | 100 |
| 2014-2015 | n | 157 | 102 | 36 | 0 | 0 | 0 | 0 | 295 |
|  | % | 53.2 | 34.6 | 12.2 | 0.0 | 0.0 | 0.0 | 0.0 | 100 |
| 2015-2016 | n | 24 | 12 | 4 | 0 | 0 | 0 | 0 | 40 |
|  | % | 60.0 | 30.0 | 10.0 | 0.0 | 0.0 | 0.0 | 0.0 | 100 |
| 2016-2017 | n | 516 | 462 | 155 | 129 | 17 | 9 | 0 | 1,288 |
|  | % | 40.1 | 35.9 | 12.0 | 10.0 | 1.3 | 0.7 | 0.0 | 100 |
| 2017-2018 | n | 810 | 883 | 162 | 47 | 29 | 27 | 2 | 1,960 |
|  | % | 41.3 | 45.1 | 8.3 | 2.4 | 1.5 | 1.4 | 0.1 | 100 |
| 2018-2019 | n | 594 | 848 | 294 | 93 | 35 | 22 | 0 | 1,886 |
|  | % | 31.5 | 45.0 | 15.6 | 4.9 | 1.9 | 1.2 | 0.0 | 100 |
| Total | n | 2,411 | 2,434 | 684 | 289b | 81b | 58b | 2b | 5,959c |
|  | % | 40.5 | 40.9 | 11.5 | 4.9 | 1.4 | 1.0 | 0.0 | 100 |

a Closures with missing information on the length of closures were imputed to 1-day (n=631, 11% of total closures).

b Among a total of 430 closures with ≥4 days, 195 (45%) occurred in Tennessee, 156 (36%) in Kentucky, 16 (4%) in Alabama, 12 (3%) in Missouri, and 11 (3%) in Texas.

c During the eight academic years from 2011-12 to 2018-19, 5,959 ILI-related closures occurred among 3,501 schools.

ILI, influenza or influenza-like illness

**Appendix 5-1.** Number of ILI-related reactive school closures among public schools from 2011-2012 to 2018-2019, by urbanicity of school location and length of closures

|  | City | | Suburban | | Town | | Rural | | Total | |
| --- | --- | --- | --- | --- | --- | --- | --- | --- | --- | --- |
|  | n | % | n | % | n | % | n | % | n | % |
| By Length of closures (per closure) | | | | | | | | | | |
| 1-day | 422 | 55.1 | 225 | 38.0 | 429 | 33.6 | 1,214 | 39.3 | 2,290 | 40.0 |
| 2-day | 269 | 35.1 | 282 | 47.6 | 572 | 44.8 | 1,234 | 40.0 | 2,357 | 41.2 |
| 3-day | 15 | 2.0 | 37 | 6.3 | 212 | 16.6 | 401 | 13.0 | 665 | 11.6 |
| 4-day | 51 | 6.7 | 48 | 8.1 | 28 | 2.2 | 147 | 4.8 | 274 | 4.8 |
| 5-day | 9 | 1.2 | 0 | 0.0 | 17 | 1.3 | 53 | 1.7 | 79 | 1.4 |
| 6-day | 0 | 0.0 | 0 | 0.0 | 20 | 1.6 | 37 | 1.2 | 57 | 1.0 |
| 7-day | 0 | 0.0 | 0 | 0.0 | 0 | 0.0 | 2 | 0.1 | 2 | 0.0 |
| Total | 766 | 100.0 | 592 | 100.0 | 1,278 | 100.0 | 3,088 | 100.0 | 5,724* | 100.0 |

* During the eight academic years from 2011-12 to 2018-19, 5,724 ILI-related closures (96% of total closures) occurred among 3,289 public schools.

ILI, influenza or influenza-like illness

**Appendix 5-2.** Number of public schools with multiple ILI-related reactive school closures, by urbanicity of school location

|  | City | | Suburban | | Town | | Rural | | Total | |
| --- | --- | --- | --- | --- | --- | --- | --- | --- | --- | --- |
|  | n | % | n | % | n | % | n | % | n | % |
| Number of closures for each school in a given school year | | | | | | | | | | |
| 1 | 357 | 85.6 | 224 | 78.9 | 673 | 87.4 | 1,579 | 86.9 | 2,833 | 86.1 |
| 2 | 60 | 14.4 | 60 | 21.1 | 88 | 11.4 | 233 | 12.8 | 441 | 13.4 |
| 3 | 0 | 0.0 | 0 | 0.0 | 9 | 1.2 | 6 | 0.3 | 15 | 0.5 |
| Total | 417 | 100.0 | 284 | 100.0 | 770 | 100.0 | 1,818 | 100.0 | 3,289 | 100.0 |
| Number of closures for each school from 2011-2012 to 2018-2019 | | | | | | | | | | |
| 1 | 263 | 63.1 | 133 | 46.8 | 466 | 60.5 | 1,127 | 62.0 | 1,989 | 60.5 |
| 2 | 55 | 13.2 | 67 | 23.6 | 196 | 25.5 | 359 | 19.7 | 677 | 20.6 |
| 3 | 51 | 12.2 | 43 | 15.1 | 60 | 7.8 | 199 | 10.9 | 353 | 10.7 |
| 4 | 0 | 0.0 | 12 | 4.2 | 23 | 3.0 | 58 | 3.2 | 93 | 2.8 |
| 5 | 48 | 11.5 | 29 | 10.2 | 23 | 3.0 | 55 | 3.0 | 155 | 4.7 |
| 7 | 0 | 0.0 | 0 | 0.0 | 0 | 0.0 | 3 | 0.2 | 3 | 0.1 |
| 8 | 0 | 0.0 | 0 | 0.0 | 2 | 0.3 | 15 | 0.8 | 17 | 0.5 |
| 9 | 0 | 0.0 | 0 | 0.0 | 0 | 0.0 | 2 | 0.1 | 2 | 0.1 |
| Total | 417 | 100.0 | 284 | 100.0 | 770 | 100.0 | 1,818 | 100.0 | 3,289 | 100.0 |

ILI, influenza or influenza-like illness

**Appendix 6.** Number of ILI-related reactive school closures and productivity costs from 2011-2012 to 2018-2019

|  | Number of school closures | Productivity Costs (2019 USD) | | | |
| --- | --- | --- | --- | --- | --- |
| School year | Parents | Teachers | School staff | Total |
| 2011-2012 | 104 | 1,347,761 | 1,378,393 | 1,534,538 | 4,260,692 |
| 2012-2013 | 375 | 6,449,499 | 6,563,862 | 7,785,237 | 20,798,599 |
| 2013-2014 | 11 | 86,766 | 92,944 | 83,936 | 263,646 |
| 2014-2015 | 295 | 5,875,487 | 5,834,845 | 6,110,971 | 17,821,303 |
| 2015-2016 | 40 | 674,239 | 666,241 | 821,781 | 2,162,261 |
| 2016-2017 | 1,288 | 37,579,105 | 36,375,387 | 42,449,055 | 116,403,546 |
| 2017-2018 | 1,960 | 48,778,766 | 47,544,630 | 53,385,564 | 149,708,960 |
| 2018-2019 | 1,886 | 52,763,292 | 50,445,356 | 61,820,608 | 165,029,256 |
| Total | 5,959 | 153,554,916 | 148,901,658 | 173,991,690 | 476,448,263 |

ILI, influenza or influenza-like illness

**Appendix 7.** Sensitivity analysis of productivity costs of parents and total productivity costs associated with ILI-related reactive school closures by varying the fraction of parents missing work (range: 10% to 45%)

|  | Productivity cost of parents (2019 USD) | | | Total productivity costs* (2019 USD) | | |
| --- | --- | --- | --- | --- | --- | --- |
| School year | Base case (20%) | LL (10%) | UL (45%) | Base case (20%) | LL (10%) | UL (45%) |
| 2011‒2012 | 1,347,761 | 673,880 | 3,032,462 | 4,260,692 | 3,586,812 | 5,945,393 |
| 2012‒2013 | 6,449,499 | 3,224,750 | 14,511,373 | 20,798,599 | 17,573,849 | 28,860,473 |
| 2013‒2014 | 86,766 | 43,383 | 195,224 | 263,646 | 220,263 | 372,104 |
| 2014‒2015 | 5,875,487 | 2,937,744 | 13,219,847 | 17,821,303 | 14,883,559 | 25,165,662 |
| 2015‒2016 | 674,239 | 337,120 | 1,517,038 | 2,162,261 | 1,825,141 | 3,005,059 |
| 2016‒2017 | 37,579,105 | 18,789,553 | 84,552,986 | 116,403,546 | 97,613,994 | 163,377,428 |
| 2017‒2018 | 48,778,766 | 24,389,383 | 109,752,223 | 149,708,960 | 125,319,577 | 210,682,417 |
| 2018‒2019 | 52,763,292 | 26,381,646 | 118,717,407 | 165,029,256 | 138,647,609 | 230,983,371 |
| Total | 153,554,916 | 76,777,458 | 345,498,560 | 476,448,263 | 399,670,805 | 668,391,907 |

* Total productivity costs include productivity costs of parents, teachers, and non-teaching school staff.

ILI, influenza or influenza-like illness; LL, lower-level; UL, upper-level

**Appendix 8.** Mean number of ILI-related reactive school closures per year and the mean total productivity cost per year, by state and by study period

|  | **Average number of closures per year (n)** | | | **Average total productivity cost per year (2019 USD)** | | |
| --- | --- | --- | --- | --- | --- | --- |
| **State** | **2011/12‒2015/16** | **2016/17‒2018/19** | **2011/12‒2018/19** | **2011/12‒2015/16** | **2016/17‒2018/19** | **2011/12‒2018/19** |
| TN | 51.0 | 820.0 | 339.4 | 2,947,167 | 82,609,824 | 32,820,664 |
| KY | 52.0 | 282.7 | 138.5 | 3,468,643 | 27,944,236 | 12,646,990 |
| TX | 0.6 | 123.3 | 46.6 | 25,358 | 6,502,554 | 2,454,307 |
| MI | 11.2 | 95.7 | 42.9 | 419,307 | 5,075,112 | 2,165,234 |
| OK | 15.0 | 77.7 | 38.5 | 462,395 | 3,324,601 | 1,535,722 |
| AL | 0.2 | 47.3 | 17.9 | 26,155 | 3,685,264 | 1,398,321 |
| AR | 2.8 | 50.0 | 20.5 | 161,684 | 2,850,305 | 1,169,917 |
| GA | 3.8 | 11.7 | 6.8 | 478,402 | 1,761,701 | 959,639 |
| MO | 7.2 | 38.0 | 2.6 | 261,630 | 1,805,814 | 840,699 |
| ID | 1.8 | 32.3 | 13.3 | 35,110 | 1,548,790 | 602,740 |
| OH | 4.2 | 14.3 | 8.0 | 165,256 | 1,063,443 | 502,076 |
| VA | 0.2 | 15.7 | 6.0 | 1,435 | 1,112,024 | 417,906 |
| LA | 0.2 | 17.0 | 6.5 | 7,348 | 733,123 | 279,514 |
| NC | 3.2 | 12.7 | 6.8 | 90,152 | 510,638 | 247,834 |
| IL | 0.8 | 7.7 | 3.4 | 62,002 | 395,937 | 187,227 |
| MS | 0.4 | 6.3 | 2.6 | 36,370 | 321,805 | 143,408 |
| KS | NR | 11.3 | 4.3 | 0 | 348,436 | 130,664 |
| NJ | 0.8 | 2.0 | 1.3 | 55,570 | 246,436 | 127,145 |
| WI | 0.6 | 7.0 | 3.0 | 8,767 | 278,577 | 109,946 |
| WV | 2.2 | 3.0 | 2.5 | 97,232 | 127,939 | 108,747 |
| CO | 1.0 | 4.3 | 2.3 | 12,838 | 226,404 | 92,925 |
| MN | 1.2 | 2.0 | 1.5 | 38,187 | 141,137 | 76,793 |
| IN | 0.2 | 3.0 | 1.3 | 11,338 | 148,329 | 62,710 |
| NM | NR | 6.7 | 2.5 | 0 | 166,287 | 62,358 |
| NE | 0.6 | 3.7 | 1.8 | 24,522 | 102,175 | 53,642 |
| SC | 0.2 | 2.0 | 0.9 | 14,386 | 97,568 | 45,579 |
| NY | 0.2 | 2.3 | 1.0 | 3,832 | 112,110 | 44,436 |
| FL | 0.4 | 1.7 | 0.9 | 14,516 | 72,301 | 36,185 |
| WA | 1.0 | NR | 0.6 | 56,705 | 0 | 35,441 |
| MD | NR | 1.0 | 0.4 | 0 | 84,814 | 31,805 |
| PA | 0.2 | 0.7 | 0.4 | 4,738 | 70,533 | 29,411 |
| IA | 0.2 | 1.7 | 0.8 | 10,369 | 58,798 | 28,529 |
| OR | 0.2 | 0.7 | 0.4 | 20,078 | 42,588 | 28,520 |
| VT | NR | 1.3 | 0.5 | 0 | 52,341 | 19,628 |
| MA | 0.4 | NR | 0.3 | 28,374 | 0 | 17,734 |
| SD | NR | 3.0 | 1.1 | 0 | 34,879 | 13,080 |
| CA | 0.2 | 0.3 | 0.3 | 2,136 | 22,824 | 9,894 |
| NH | NR | 0.3 | 0.1 | 0 | 13,139 | 4,927 |
| ME | NR | 0.3 | 0.1 | 0 | 8,459 | 3,172 |
| CT | NR | 0.3 | 0.1 | 0 | 7,142 | 2,678 |
| AZ | NR | 0.3 | 0.1 | 0 | 5,534 | 2,075 |
| MT | 0.6 | NR | 0.4 | 3,150 | 0 | 1,969 |
| AK | NR | NR | NR | 0 | 0 | 0 |
| DC | NR | NR | NR | 0 | 0 | 0 |
| DE | NR | NR | NR | 0 | 0 | 0 |
| HI | NR | NR | NR | 0 | 0 | 0 |
| ND | NR | NR | NR | 0 | 0 | 0 |
| NV | NR | NR | NR | 0 | 0 | 0 |
| RI | NR | NR | NR | 0 | 0 | 0 |
| UT | NR | NR | NR | 0 | 0 | 0 |
| WY | NR | NR | NR | 0 | 0 | 0 |

ILI, influenza or influenza-like illness; NR, not reported

**Appendix 9.** Annual total productivity cost per student among schools with ILI-related reactive closures from 2016‒2017 to 2018‒2019 (2019 USD)

|  | **Overall** | **By urbanicity of school location** | | | |
| --- | --- | --- | --- | --- | --- |
| **Estimates** | **City** | **Suburban** | **Town** | **Rural** |
| Minimum | 17.3 | 24.3 | 25.9 | 22.2 | 17.3 |
| 25th percentile | 34.0 | 31.3 | 57.8 | 37.2 | 36.7 |
| Median | 66.3 | 39.4 | 85.8 | 67.5 | 66.9 |
| **Mean** | **99.8** | **98.6** | **112.7** | **99.2** | **98.1** |
| 75th percentile | 122.4 | 95.6 | 118.3 | 128.4 | 124.0 |
| Interquartile range | 88.4 | 64.4 | 60.5 | 91.2 | 87.3 |

ILI, influenza or influenza-like illness

**Appendix 10**. Total productivity costs associated with ILI-related reactive school closures from 2011‒2012 to 2018‒2019 among public schools and total number of students in U.S. public schools in 2015‒2016

|  | Overall | By urbanicity of school location | | | |
| --- | --- | --- | --- | --- | --- |
|  | City | Suburban | Town | Rural |
| Total productivity costs among public schools with ILI-related closures, 2011-2012 to 2018-2019 (2019 USD) | | | | | |
| All public schools | 460,599,747 | 62,149,629 | 69,812,689 | 112,376,093 | 216,261,335 |
| Tennessee | 257,862,754 | 44,485,510 | 57,512,449 | 54,250,622 | 101,614,173 |
| Kentucky | 100,574,776 | 6,279,838 | 3,608,591 | 30,200,798 | 60,590,412 |
| Arkansas | 9,359,337 | 0 | 1,053,703 | 4,004,342 | 4,301,292 |
| Oklahoma | 12,191,411 | 1,661,003 | 154,842 | 2,718,244 | 7,657,322 |
| Idaho | 4,810,672 | 11,248 | 90,824 | 1,453,958 | 3,265,889 |
| Others (46 states) | 75,800,797 | 9,712,031 | 7,392,280 | 19,748,128 | 38,832,248 |
| Number of students in the U.S. public schools, 2015-2016 (n)* | | | | | |
| All U.S. public schools | 49,312,454 | 14,892,361 | 19,577,044 | 5,572,307 | 9,221,429 |
| Tennessee | 991,648 | 322,286 | 203,288 | 164,614 | 300,469 |
| Kentucky | 676,793 | 108,287 | 149,571 | 172,582 | 247,029 |
| Arkansas | 491,390 | 140,538 | 69,777 | 115,968 | 165,107 |
| Oklahoma | 692,546 | 164,133 | 153,745 | 163,441 | 211,227 |
| Idaho | 286,447 | 66,742 | 79,632 | 68,461 | 71,039 |
| Others (46 states) | 46,173,630 | 14,090,376 | 18,921,030 | 4,887,242 | 8,226,558 |

* Total number of students in the U.S. public schools (overall and by urbanicity category) were based on the National Center for Education Statistics (https://nces.ed.gov/pubs2018/2018052/tables/table_04.asp)

ILI, influenza or influenza-like illness

**Appendix 11**. Annual total productivity cost per student associated with ILI-related reactive school closures among all U.S. public schools, by state* and academic year (2019 USD)


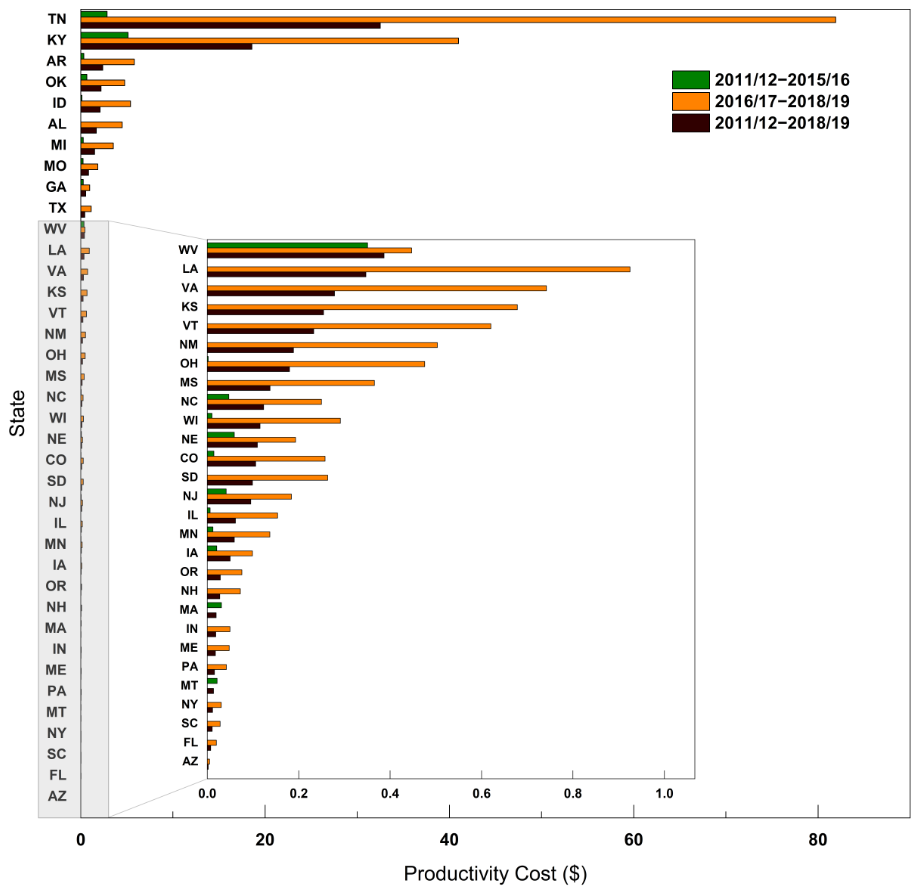


* No ILI-related reactive school closures were observed in public schools in the states of WY,WA, UT,RI, ND, NV, MD, HI, DC, DE, CT, CA, and AK from 2011‒12 to 2018‒19.

ILI, influenza or influenza-like illness

**References**

1. Occupational Employment and Wage Statistics. Washington, DC: U.S. Bureau of Labor Statistics; 2022 [cited 2022 March 15]. Available from: <https://www.bls.gov/oes/current/oessrcst.htm>.

2. Digest of Education Statistics 2021. Table 213.20. Staff employed in public elementary and secondary school systems, by type of assignment and state or jurisdiction: Fall 2019. Washington, DC: National Center for Education Statistics, Institute of Education Sciences, U.S. Department of Education; 2022 [cited 2022 May 3]. Available from: <https://nces.ed.gov/programs/digest/d21/tables/dt21_213.20.asp>.

3. Digest of Education Statistics 2014. Table 213.20. Staff employed in public elementary and secondary school systems, by type of assignment and state or jurisdiction: Fall 2012 Washington, DC: National Center for Education Statistics, Institute of Education Sciences, U.S. Department of Education 2014 [cited 2022 May 6]. Available from: <https://nces.ed.gov/programs/digest/d14/tables/dt14_213.20.asp>.

4. Digest of Education Statistics 2021. Table 213.50. Staff, enrollment, and pupil/staff ratios in public elementary and secondary school systems, by state or jurisdiction: Selected years, fall 2000 through fall 2019 Washington, DC: National Center for Education Statistics, Institute of Education Sciences, U.S. Department of Education 2022 [cited 2022 May 6]. Available from: <https://nces.ed.gov/programs/digest/d21/tables/dt21_213.50.asp?current=yes>.

5. Germann TC, Gao H, Gambhir M, Plummer A, Biggerstaff M, Reed C, et al. School dismissal as a pandemic influenza response: When, where and for how long? Epidemics. 2019;28:100348. Epub 20190612. doi: 10.1016/j.epidem.2019.100348. PubMed PMID: 31235334; PubMed Central PMCID: PMCPMC6956848.

6. Steelfisher GK, Blendon RJ, Bekheit MM, Liddon N, Kahn E, Schieber R, et al. Parental attitudes and experiences during school dismissals related to 2009 influenza A (H1N1) --- United States, 2009. MMWR Morb Mortal Wkly Rep. 2010;59(35):1131-4. PubMed PMID: 20829746.

7. Timperio C, Hunbaugh K, Riggs M, Barrios L, Waller A, Deniston M, et al. Impact of seasonal influenza-related school closures on families - Southeastern Kentucky, February 2008. MMWR Morb Mortal Wkly Rep. 2009;58(50):1405-9. PubMed PMID: 20032924.

8. Russell ES, Zheteyeva Y, Gao H, Shi J, Rainey JJ, Thoroughman D, et al. Reactive School Closure During Increased Influenza-Like Illness (ILI) Activity in Western Kentucky, 2013: A Field Evaluation of Effect on ILI Incidence and Economic and Social Consequences for Families. Open Forum Infect Dis. 2016;3(3):ofw113. Epub 20160525. doi: 10.1093/ofid/ofw113. PubMed PMID: 27800520; PubMed Central PMCID: PMCPMC5084722.

9. Mizumoto K, Yamamoto T, Nishiura H. Contact behaviour of children and parental employment behaviour during school closures against the pandemic influenza A (H1N1-2009) in Japan. J Int Med Res. 2013;41(3):716-24. Epub 20130423. doi: 10.1177/0300060513478061. PubMed PMID: 23613502.

10. Johnson AJ, Moore ZS, Edelson PJ, Kinnane L, Davies M, Shay DK, et al. Household responses to school closure resulting from outbreak of influenza B, North Carolina. Emerg Infect Dis. 2008;14(7):1024-30. doi: 10.3201/eid1407.080096. PubMed PMID: 18598620; PubMed Central PMCID: PMCPMC2600319.

11. Epson EE, Zheteyeva YA, Rainey JJ, Gao H, Shi J, Uzicanin A, et al. Evaluation of an unplanned school closure in a Colorado school district: implications for pandemic influenza preparedness. Disaster Med Public Health Prep. 2015;9(1):4-8. doi: 10.1017/dmp.2015.3. PubMed PMID: 25739043.

12. Employer Costs for Employee Compensation. Washington, DC: U.S. Bureau of Labor Statistics; 2022 [updated June 17; cited 2022 March 31]. Available from: <https://www.bls.gov/bls/news-release/ecec.htm#2011>.
